# Supplementary material
Source: PubMed Central journal article supplement (PMC8629832)
Supplement: NIHMS1727632-supplement-Supplemental_Material.pdf [file NIHMS1727632-supplement-Supplemental_Material.pdf]

Complex Solutions for a Complex Problem: A Meta-Analysis of the Efficacy of Multiple-  
Behavior Interventions on Change in Outcomes Related to HIV

Aashna Sunderrajan <sup>a</sup>

Benjamin White <sup>a</sup>

Marta Durantini <sup>a</sup>

Flor Sanchez <sup>b</sup>

Laura Glasman <sup>c</sup>

Dolores Albarracín <sup>a</sup>

<sup>a</sup> University of Illinois, Urbana-Champaign

<sup>b</sup> Universidad Autónoma de Madrid

<sup>c</sup> Medical College of Wisconsin

Table of Contents

APPENDIX A: Keywords used in the literature search .....3

APPENDIX B: Flow of reports included in the meta-analysis.....4

APPENDIX C: Table of reports included in the meta-analysis.....5

APPENDIX D: Outcomes measured in the meta-analysis .....27

APPENDIX E: Coding exploratory study characteristics .....28

APPENDIX F: Descriptive statistics .....30

APPENDIX G: Data analytic plan.....33

APPENDIX H: Funnel plot for reports included in the meta-analysis .....36

APPENDIX I: Results of intervention efficacy based on recommendation number .....37

APPENDIX J: Figure of the weighted-mean average of overall change for each recommendation number .....38

APPENDIX K: Figure of the weighted-mean average of overall change for each recommendation number for outcomes .....39

APPENDIX L: Exploratory moderator analyses .....41

APPENDIX M: References included in the appendices.....42

## APPENDIX A

### Keywords used in the literature search

Our search terms included: *intervention, health education, persuasion, recommendation, treatment, educational program, rehabilitation, counseling outcomes, treatment outcomes, treatment effectiveness evaluation, treatment compliance, health promotion, behavior change* and *randomized trial*. To identify interventions targeting multiple HIV-related behaviors or domains, these keywords were entered in combination with keywords, including: *HIV, AIDS, STI, condom use, circumcision, alcohol use, drug use, and adherence*.

APPENDIX B

Flow of reports included in the meta-analysis

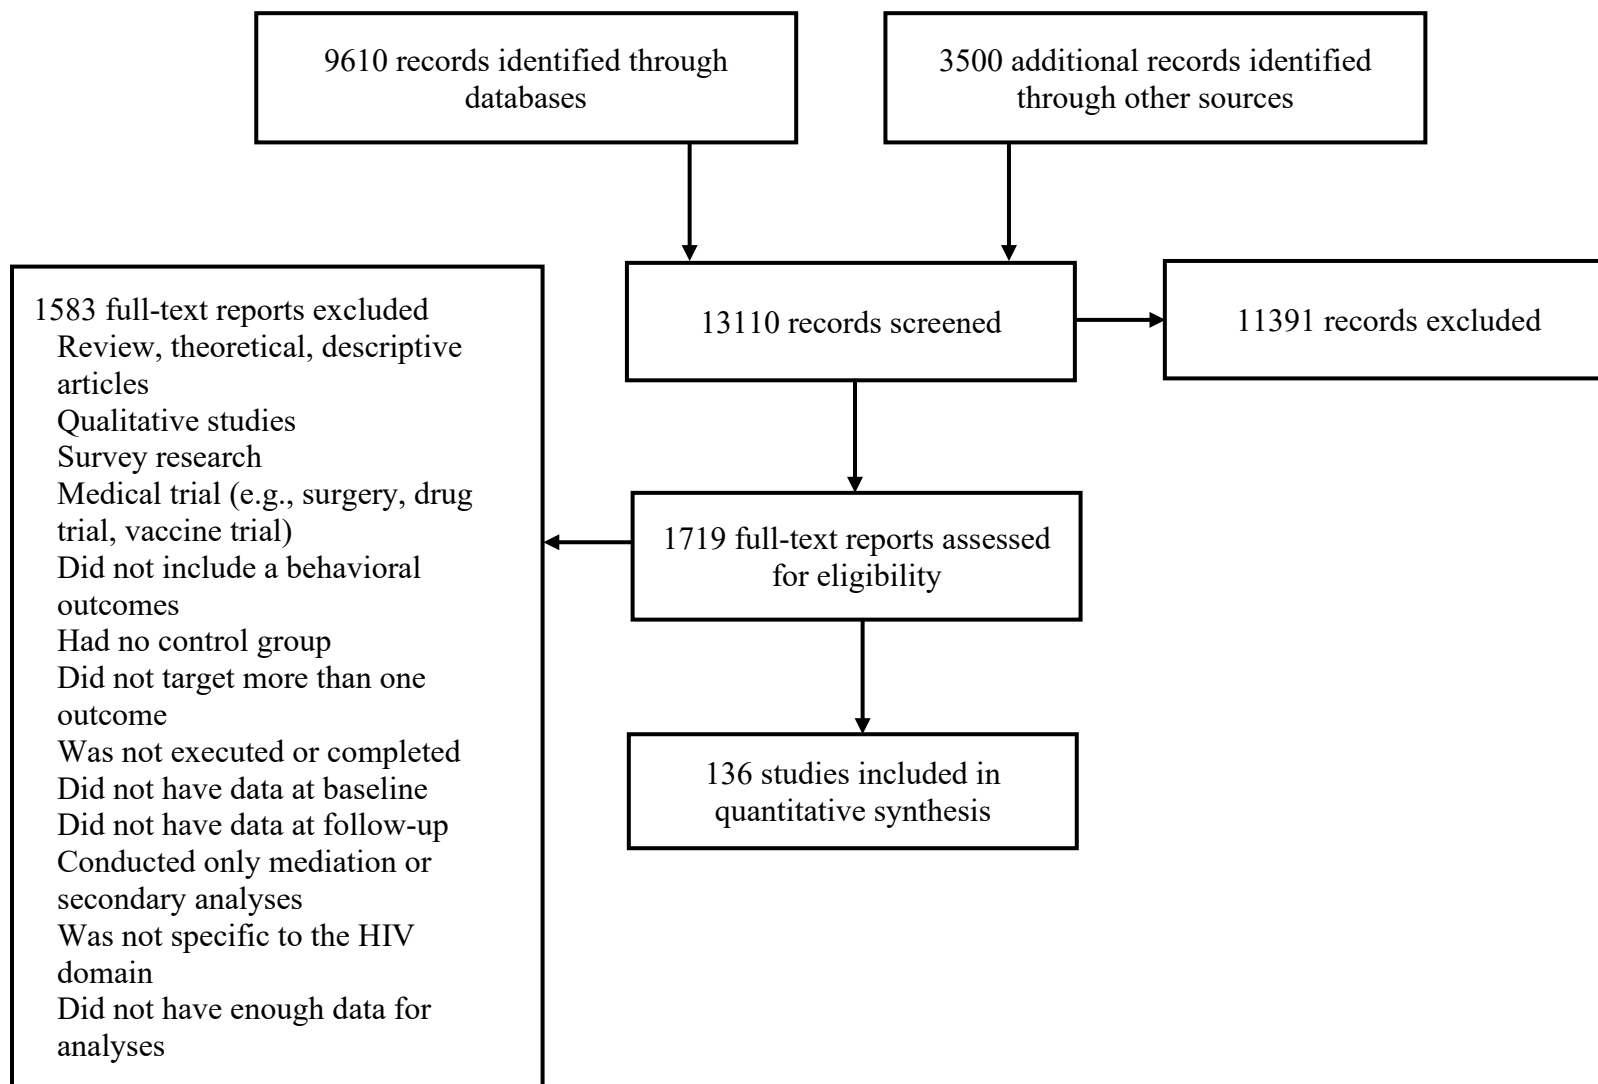

## APPENDIX C

Reports included in the meta-analysis

| <b>Author<br/>(Year)</b>                                   | <b>Objective</b>                                                                                                                                            | <b>Group<sup>a</sup></b>       | <b>Number of<br/>Recommendati<br/>ons</b> | <b>Number of<br/>Main<br/>Recommend<br/>ations</b> | <b>Number of<br/>Auxiliary<br/>Recommendations</b> | <b>Sample<br/>Size</b> |
|------------------------------------------------------------|-------------------------------------------------------------------------------------------------------------------------------------------------------------|--------------------------------|-------------------------------------------|----------------------------------------------------|----------------------------------------------------|------------------------|
| Aharonovich,<br>Stohl,<br>Cannizzaro<br>& Hasina<br>(2017) | To investigate the feasibility and efficacy of reducing non-injection drug use and alcohol use with HealthCall                                              | Multiple-behavior intervention | 4                                         | 2                                                  | 2                                                  | 24                     |
|                                                            |                                                                                                                                                             | Multiple-behavior intervention | 5                                         | 2                                                  | 3                                                  | 23                     |
| Amaro et al.<br>(2007)                                     | To test the effectiveness of a substance abuse treatment combined with HIV/AIDS prevention on reducing sexual risk behaviors                                | Multiple-behavior intervention | 2                                         | 2                                                  | 0                                                  | 161                    |
|                                                            |                                                                                                                                                             | Multiple-behavior intervention | 6                                         | 2                                                  | 4                                                  | 181                    |
| Amirkhanian<br>et al. (2005)                               | To evaluate an HIV prevention intervention program with social networks of MSM                                                                              | Single-behavior intervention   | 1                                         | 1                                                  | 0                                                  | 276                    |
|                                                            |                                                                                                                                                             | Multiple-behavior intervention | 4                                         | 2                                                  | 2                                                  | 133                    |
| Avants,<br>Margolin,<br>Usubiaga &<br>Doebrick<br>(2004)   | To investigate the efficacy of a harm reduction group intervention for IDUs, based on the Information-Motivation-Behavioral skills model of behavior change | Multiple-behavior intervention | 2                                         | 2                                                  | 0                                                  | 112                    |
|                                                            |                                                                                                                                                             | Multiple-behavior intervention | 7                                         | 2                                                  | 5                                                  | 112                    |
| Bachanas et<br>al. (2016)                                  | To assess the effectiveness of a multi-component, clinic-based HIV prevention intervention for HIV-positive people                                          | Control                        | 0                                         | 0                                                  | 0                                                  | 1778                   |
|                                                            |                                                                                                                                                             | Multiple-behavior intervention | 5                                         | 2                                                  | 3                                                  | 1744                   |

|                                                        |                                                                                                                                                                |                                |   |   |   |      |
|--------------------------------------------------------|----------------------------------------------------------------------------------------------------------------------------------------------------------------|--------------------------------|---|---|---|------|
| Bahromov & Weine (2011)                                | To evaluate the feasibility of the Transit to Russia AIDS Intervention with Newcomers (TRAIN) prevention intervention                                          | Control                        | 0 | 0 | 0 | 30   |
|                                                        |                                                                                                                                                                | Multiple-behavior intervention | 2 | 2 | 0 | 30   |
| Bailey et al. (2007)                                   | To determine whether male circumcision had a protective effect against HIV infection, and determine the changes in sexual behavior that may be related to this | Control                        | 0 | 0 | 0 | 1393 |
|                                                        |                                                                                                                                                                | Single-behavior intervention   | 1 | 1 | 0 | 1391 |
| Baird, Garfein, McIntosh & Özler (2012)                | To evaluate a cash transfer program's ability to reduce the risk of STI                                                                                        | Control                        | 0 | 0 | 0 | 1948 |
|                                                        |                                                                                                                                                                | Single-behavior intervention   | 1 | 1 | 0 | 1848 |
| Barnett, Sorensen, Wong, Haug & Hall (2009)            | To assess the effects of incentives to improve the HAART adherence                                                                                             | Single-behavior intervention   | 1 | 1 | 0 | 32   |
|                                                        |                                                                                                                                                                | Single-behavior intervention   | 1 | 1 | 0 | 34   |
| Berrien, Salazar, Reynolds & McKay (2004)              | To determine if a home-based nursing intervention can improve medication adherence                                                                             | Multiple-behavior intervention | 2 | 2 | 0 | 15   |
|                                                        |                                                                                                                                                                | Multiple-behavior intervention | 3 | 2 | 1 | 19   |
| Borawski, Trapl, Lovegreen, Colabianchi & Block (2005) | To assess the effectiveness of an abstinence-until-marriage curriculum                                                                                         | Control                        | 0 | 0 | 0 | 973  |
|                                                        |                                                                                                                                                                | Single-behavior intervention   | 1 | 1 | 0 | 1096 |
| Boyer et al. (2005)                                    | To evaluate the use of a cognitive-behavioral                                                                                                                  | Multiple-behavior intervention | 2 | 2 | 0 | 1062 |

|                                |                                                                                                                                                                    |                                |   |   |   |      |
|--------------------------------|--------------------------------------------------------------------------------------------------------------------------------------------------------------------|--------------------------------|---|---|---|------|
|                                | intervention on the prevention of STIs and unintended pregnancies                                                                                                  | Multiple-behavior intervention | 3 | 2 | 1 | 1095 |
| Boyer, Shafer & Tschann (1997) | To assess the efficacy of a school-based knowledge-building and cognitive-behavioral skills-building STI/HIV prevention intervention program                       | Multiple-behavior intervention | 2 | 2 | 0 | 303  |
|                                |                                                                                                                                                                    | Multiple-behavior intervention | 8 | 2 | 6 | 210  |
| Cade et al. (2010)             | To evaluate whether a yoga lifestyle intervention improves CVD risk factors, virologic or immunologic status, or quality of life in HIV-infected adults            | Control                        | 0 | 0 | 0 | 26   |
|                                |                                                                                                                                                                    | Single-behavior intervention   | 1 | 1 | 0 | 34   |
| Calsyn et al. (2010)           | To determine the effectiveness of the Real Men Are Safe intervention in reducing sex under the influence of drugs or alcohol for people in substance use treatment | Single-behavior intervention   | 1 | 1 | 0 | 179  |
|                                |                                                                                                                                                                    | Multiple-behavior intervention | 2 | 2 | 0 | 177  |
| Calsyn et al. (2009)           | To determine the effectiveness of a motivational and skills training HIV/AIDS group intervention program                                                           | Single-behavior intervention   | 1 | 1 | 0 | 291  |
|                                |                                                                                                                                                                    | Multiple-behavior intervention | 5 | 2 | 3 | 282  |
| Carrico et al. (2006)          | To examine the efficacy of an intervention, combining a cognitive behavioral stress management intervention with a medication adherence training program           | Single-behavior intervention   | 1 | 1 | 0 | 76   |
|                                |                                                                                                                                                                    | Multiple-behavior intervention | 2 | 2 | 0 | 54   |

|                                                       |                                                                                                                          |                                |    |   |   |     |
|-------------------------------------------------------|--------------------------------------------------------------------------------------------------------------------------|--------------------------------|----|---|---|-----|
| Carrico et al. (2015)                                 | To test the feasibility of a 5-session, positive affect intervention for methamphetamine-using men who have sex with men | Multiple-behavior intervention | 3  | 2 | 1 | 9   |
|                                                       |                                                                                                                          | Multiple-behavior intervention | 5  | 2 | 3 | 12  |
| Chernoff & Davison (2005)                             | To evaluate a self-administered intervention to increase HIV/AIDS risk reduction                                         | Control                        | 0  | 0 | 0 | 77  |
|                                                       |                                                                                                                          | Multiple-behavior intervention | 4  | 2 | 2 | 78  |
| Chiou et al. (2006)                                   | To evaluate the effect of a symptom management program on drug adherence and quality of life in people with HIV/AIDS     | Control                        | 0  | 0 | 0 | 22  |
|                                                       |                                                                                                                          | Multiple-behavior intervention | 9  | 2 | 7 | 22  |
|                                                       |                                                                                                                          | Multiple-behavior intervention | 10 | 2 | 8 | 23  |
| Cianelli, Ferrer, Norr, Irarrazabal & Bernales (2012) | To determine the use of a peer group intervention for HIV prevention                                                     | Control                        | 0  | 0 | 0 | 218 |
|                                                       |                                                                                                                          | Multiple-behavior intervention | 2  | 2 | 0 | 182 |
| Cornman, Schmiede, Bryan, Benziger & Fisher (2007)    | To evaluate an intervention based on the Information-Motivation-Behavioral Skills model                                  | Control                        | 0  | 0 | 0 | 125 |
|                                                       |                                                                                                                          | Single-behavior intervention   | 1  | 1 | 0 | 125 |
| Creswell, Myers, Cole & Irwin (2009)                  | To evaluate the efficacy of a mindfulness-based stress reduction meditation program                                      | Control                        | 0  | 0 | 0 | 26  |
|                                                       |                                                                                                                          | Single-behavior intervention   | 1  | 1 | 0 | 41  |
| da Costa et al. (2012)                                | To see if an SMS-based warning system increases medication adherence                                                     | Control                        | 0  | 0 | 0 | 15  |
|                                                       |                                                                                                                          | Single-behavior intervention   | 1  | 1 | 0 | 14  |
|                                                       |                                                                                                                          | Control                        | 0  | 0 | 0 | 170 |



|                                               |                                                                                                                                                    |                                |   |   |   |     |
|-----------------------------------------------|----------------------------------------------------------------------------------------------------------------------------------------------------|--------------------------------|---|---|---|-----|
| da Silveira & dos Santos (2006)               | To test an intervention aimed at increasing condom use by partners                                                                                 | Single-behavior intervention   | 1 | 1 | 0 | 170 |
| DiClemente et al. (2004)                      | To determine the efficacy of an intervention to reduce HIV/STI sexual risk                                                                         | Multiple-behavior intervention | 2 | 2 | 0 | 271 |
|                                               |                                                                                                                                                    | Multiple-behavior intervention | 8 | 2 | 6 | 251 |
| Dilley et al. (2002)                          | To assess whether one counseling intervention session focusing on self-justifications can reduce future high-risk behaviors among HIV-negative men | Multiple-behavior intervention | 2 | 2 | 0 | 62  |
|                                               |                                                                                                                                                    | Multiple-behavior intervention | 2 | 2 | 0 | 62  |
|                                               |                                                                                                                                                    | Multiple-behavior intervention | 2 | 2 | 0 | 62  |
|                                               |                                                                                                                                                    | Multiple-behavior intervention | 2 | 2 | 0 | 62  |
| Donenberg, Emerson & Kendall (2018)           | To investigate the efficacy of PHAT Life, a sexual risk reduction program, for youth on probation                                                  | Control                        | 0 | 0 | 0 | 147 |
|                                               |                                                                                                                                                    | Multiple-behavior intervention | 3 | 2 | 1 | 163 |
| Dushay, Singer, Weeks, Rohena & Gruber (2001) | To assess the efficacy of a culturally targeted intervention in lowering HIV risk                                                                  | Multiple-behavior intervention | 5 | 2 | 3 | 86  |
|                                               |                                                                                                                                                    | Multiple-behavior intervention | 5 | 2 | 3 | 453 |
| Eaton et al. (2018)                           | To investigate a sexual risk reduction intervention for STI prevention among men who have sex with men                                             | Multiple-behavior intervention | 3 | 2 | 1 | 300 |
|                                               |                                                                                                                                                    | Multiple-behavior intervention | 7 | 2 | 5 | 297 |
| El-Bassel et al. (2003)                       | To examine a relation-based HIV/STI prevention program                                                                                             | Multiple-behavior intervention | 2 | 2 | 0 | 126 |
|                                               |                                                                                                                                                    | Multiple-behavior intervention | 3 | 2 | 1 | 162 |

|                         |                                                                                                                                                                             |                                |   |   |   |      |
|-------------------------|-----------------------------------------------------------------------------------------------------------------------------------------------------------------------------|--------------------------------|---|---|---|------|
|                         |                                                                                                                                                                             | Multiple-behavior intervention | 2 | 2 | 0 | 146  |
| Feaster et al. (2010)   | To test the efficacy of the Structural Ecosystems Therapy (SET), relative to a psychoeducational health group program                                                       | Multiple-behavior intervention | 2 | 2 | 0 | 67   |
|                         |                                                                                                                                                                             | Multiple-behavior intervention | 6 | 2 | 4 | 59   |
| Fogel et al. (2015)     | To test an evidence-based HIV/STI behavioral intervention, Providing Opportunities for Women's Empowerment, Risk-Reduction and Relationships (POWER)                        | Multiple-behavior intervention | 2 | 2 | 0 | 256  |
|                         |                                                                                                                                                                             | Multiple-behavior intervention | 7 | 2 | 5 | 265  |
| Galárraga et al. (2018) | To measure the efficacy of an intervention, grounded in behavioral economics, on increased dual protection use and protection against HIV, STIs, and unintended pregnancies | Control                        | 0 | 0 | 0 | 50   |
|                         |                                                                                                                                                                             | Multiple-behavior intervention | 2 | 2 | 0 | 50   |
| Gao & Wang (2007)       | To examine the use of a culturally appropriate participatory communication and HIV/AIDS prevention program in MSM                                                           | Control                        | 0 | 0 | 0 | 80   |
|                         |                                                                                                                                                                             | Multiple-behavior intervention | 3 | 2 | 1 | 80   |
| Garcia et al. (2012)    | To see the effect of a multicomponent intervention on the prevention of STIs                                                                                                | Control                        | 0 | 0 | 0 | 8816 |
|                         |                                                                                                                                                                             | Multiple-behavior intervention | 2 | 2 | 0 | 8657 |
| Glasman et al. (2015)   | To determine whether assessments of risk behaviors change behaviors, and intervention efficacy                                                                              | Single-behavior intervention   | 1 | 1 | 0 | 611  |
|                         |                                                                                                                                                                             | Multiple-behavior intervention | 3 | 2 | 1 | 546  |

|                        |                                                                                                                                                          |                                |   |   |   |     |
|------------------------|----------------------------------------------------------------------------------------------------------------------------------------------------------|--------------------------------|---|---|---|-----|
| Go et al. (2015)       | To test the efficacy of a multi-level intervention to reduce injection and sexual risk behaviors                                                         | Multiple-behavior intervention | 2 | 2 | 0 | 89  |
|                        |                                                                                                                                                          | Multiple-behavior intervention | 2 | 2 | 0 | 95  |
|                        |                                                                                                                                                          | Multiple-behavior intervention | 5 | 2 | 3 | 139 |
|                        |                                                                                                                                                          | Multiple-behavior intervention | 5 | 2 | 3 | 132 |
| Goggin et al. (2013)   | To determine the efficacy of a motivational interviewing-based cognitive behavioral therapy adherence counseling combined with directly observed therapy | Single-behavior intervention   | 1 | 1 | 0 | 65  |
|                        |                                                                                                                                                          | Multiple-behavior intervention | 4 | 2 | 2 | 70  |
|                        |                                                                                                                                                          | Multiple-behavior intervention | 4 | 2 | 2 | 69  |
| Grimley & Hook (2009)  | To investigate the efficacy of a brief theory-based behavioral intervention                                                                              | Multiple-behavior intervention | 2 | 2 | 0 | 227 |
|                        |                                                                                                                                                          | Multiple-behavior intervention | 2 | 2 | 0 | 203 |
| Gwadz et al. (2011)    | To examine a peer-driven intervention and its ability to increase screening rates for AIDS clinical trials                                               | Single-behavior intervention   | 1 | 1 | 0 | 127 |
|                        |                                                                                                                                                          | Multiple-behavior intervention | 3 | 2 | 1 | 215 |
| Hadley et al. (2016)   | To test an interactive DVD and workbook, designed for African-American parents and adolescents, to address key factors associated with risk              | Control                        | 0 | 0 | 0 | 87  |
|                        |                                                                                                                                                          | Multiple-behavior intervention | 4 | 2 | 2 | 83  |
| Hallfors et al. (2011) | To assess whether the presence of support can keep orphans in school and reduce HIV risk                                                                 | Control                        | 0 | 0 | 0 | 145 |
|                        |                                                                                                                                                          | Multiple-behavior intervention | 3 | 2 | 1 | 184 |

|                                              |                                                                                                                                   |                                |   |   |   |     |
|----------------------------------------------|-----------------------------------------------------------------------------------------------------------------------------------|--------------------------------|---|---|---|-----|
| Hanson, Alessi & Petri (2008)                | To test if contingency management is efficacious at reducing HIV risk behaviors                                                   | Multiple-behavior intervention | 5 | 2 | 3 | 65  |
|                                              |                                                                                                                                   | Multiple-behavior intervention | 5 | 2 | 3 | 100 |
| Harrison, Pals, Sajak, Chase & Kajese (2010) | To evaluate an intervention that improves risk factor reporting                                                                   | Single-behavior intervention   | 1 | 1 | 0 | 407 |
|                                              |                                                                                                                                   | Single-behavior intervention   | 1 | 1 | 0 | 466 |
| Harvey et al. (2004)                         | To see whether a couple-based risk reduction intervention is effective                                                            | Single-behavior intervention   | 1 | 1 | 0 | 104 |
|                                              |                                                                                                                                   | Multiple-behavior intervention | 5 | 2 | 3 | 110 |
| Hershberger, Wood & Fisher (2003)            | To assess the efficacy of a cognitive-behavior intervention to reduce HIV risk behaviors                                          | Multiple-behavior intervention | 2 | 2 | 0 | 614 |
|                                              |                                                                                                                                   | Multiple-behavior intervention | 2 | 2 | 0 | 225 |
| Hoffman, Exner, Leu, Ehrhardt & Stein (2003) | To evaluate female condom use among women participating in a HIV/STI intervention designed to reduce risky sexual behaviors       | Control                        | 0 | 0 | 0 | 120 |
|                                              |                                                                                                                                   | Multiple-behavior intervention | 2 | 2 | 0 | 128 |
|                                              |                                                                                                                                   | Multiple-behavior intervention | 2 | 2 | 0 | 112 |
| Hoke et al. (2007)                           | To see whether individual clinic-based counselling as a supplement to peer education leads to reductions in sexual risk behaviors | Multiple-behavior intervention | 2 | 2 | 0 | 439 |
|                                              |                                                                                                                                   | Multiple-behavior intervention | 5 | 2 | 3 | 445 |
| Holzemer et al. (2006)                       | To determine whether a nurse-delivered, tailored intervention improved adherence to HIV medications                               | Multiple-behavior intervention | 4 | 2 | 2 | 122 |
|                                              |                                                                                                                                   | Control                        | 0 | 0 | 0 | 118 |

|                                             |                                                                                                                           |                                |   |   |   |      |
|---------------------------------------------|---------------------------------------------------------------------------------------------------------------------------|--------------------------------|---|---|---|------|
| Huber et al. (2012)                         | To assess the effect of smoking cessation counseling on HIV-positive people                                               | Multiple-behavior intervention | 2 | 2 | 0 | 2511 |
| Ingersoll et al. (2011)                     | To assess the feasibility of two interventions to improve adherence and reduce problems associated with crack cocaine use | Multiple-behavior intervention | 5 | 2 | 3 | 28   |
|                                             |                                                                                                                           | Multiple-behavior intervention | 6 | 2 | 4 | 28   |
| Jemmott, Jemmott & O'Leary (2007)           | To see whether brief HIV/STD risk-reduction interventions are efficacious for African American women                      | Control                        | 0 | 0 | 0 | 118  |
|                                             |                                                                                                                           | Multiple-behavior intervention | 2 | 2 | 0 | 118  |
|                                             |                                                                                                                           | Multiple-behavior intervention | 4 | 2 | 2 | 118  |
|                                             |                                                                                                                           | Multiple-behavior intervention | 4 | 2 | 2 | 123  |
|                                             |                                                                                                                           | Multiple-behavior intervention | 5 | 2 | 3 | 81   |
| Jemmott, Jemmott, Fong & Morales (2010)     | To examine the effectiveness of an HIV/STD risk-reduction intervention for adolescents                                    | Multiple-behavior intervention | 3 | 2 | 1 | 1716 |
|                                             |                                                                                                                           | Multiple-behavior intervention | 4 | 2 | 2 | 1729 |
| Johnson, Dilworth, Taylor & Neilands (2011) | To investigate whether improvements in coping skill of treatment side-effects can reduce nonadherence                     | Control                        | 0 | 0 | 0 | 121  |
|                                             |                                                                                                                           | Multiple-behavior intervention | 5 | 2 | 3 | 128  |
| Jones et al. (2003)                         | To examine the effects of a cognitive-behavioral intervention on adherence                                                | Multiple-behavior intervention | 3 | 2 | 1 | 92   |
|                                             |                                                                                                                           | Multiple-behavior intervention | 3 | 2 | 1 | 82   |

|                                              |                                                                                                                     |                                |   |   |   |     |
|----------------------------------------------|---------------------------------------------------------------------------------------------------------------------|--------------------------------|---|---|---|-----|
| Juzang, Fortune, Black, Wright & Bull (2011) | To explore the feasibility of using mobile phones for HIV prevention                                                | Single-behavior intervention   | 1 | 1 | 0 | 30  |
|                                              |                                                                                                                     | Multiple-behavior intervention | 2 | 2 | 0 | 30  |
| Kalichman et al. (2014)                      | To test an individual- and sociostructural-level HIV prevention intervention for men who drink                      | Single-behavior intervention   | 1 | 1 | 0 | 487 |
|                                              |                                                                                                                     | Multiple-behavior intervention | 9 | 2 | 7 | 497 |
| Kalichman et al. (2008)                      | To determine the efficacy of a brief HIV/alcohol risk-reduction intervention                                        | Multiple-behavior intervention | 2 | 2 | 0 | 183 |
|                                              |                                                                                                                     | Multiple-behavior intervention | 2 | 2 | 0 | 170 |
| Kalichman et al. (2009)                      | To see whether an integrated intervention targeting both gender-based violence and HIV risk behaviors was effective | Multiple-behavior intervention | 4 | 2 | 2 | 242 |
|                                              |                                                                                                                     | Multiple-behavior intervention | 4 | 2 | 2 | 233 |
| Kelly et al. (1997)                          | To investigate a community-level intervention in lowering risk for HIV infection                                    | Multiple-behavior intervention | 3 | 2 | 1 | 173 |
|                                              |                                                                                                                     | Multiple-behavior intervention | 3 | 2 | 1 | 265 |
| Kelly et al. (2006)                          | To assess the effects of an intervention for preventing HIV/STD                                                     | Single-behavior intervention   | 1 | 1 | 0 | 140 |
|                                              |                                                                                                                     | Multiple-behavior intervention | 5 | 2 | 3 | 145 |
| Kerrigan et al. (2006)                       | To examine the effectiveness of environmental-structural interventions in reducing HIV/STI risk                     | Multiple-behavior intervention | 2 | 2 | 0 | 210 |
|                                              |                                                                                                                     | Multiple-behavior intervention | 2 | 2 | 0 | 200 |
| Kershaw, Magriples, Westdahl,                | To explore the effects of an HIV intervention bundled                                                               | Control                        | 0 | 0 | 0 | 394 |
|                                              |                                                                                                                     | Multiple-behavior intervention | 5 | 2 | 3 | 335 |

|                                                          |                                                                                                       |                                |   |   |   |      |
|----------------------------------------------------------|-------------------------------------------------------------------------------------------------------|--------------------------------|---|---|---|------|
| Schindler & Ickovics (2009)                              | with prenatal care for HIV prevention                                                                 | Multiple-behavior intervention | 8 | 2 | 6 | 318  |
| Knudsen, Staton-Tindall, Oser, Havens & Leukefeld (2014) | To assess a prison-based intervention in reducing HIV sexual risk behaviors                           | Control                        | 0 | 0 | 0 | 180  |
|                                                          |                                                                                                       | Single-behavior intervention   | 1 | 1 | 0 | 198  |
| Koblin et al. (2004)                                     | To test the efficacy of a behavioral intervention in preventing HIV infection                         | Single-behavior intervention   | 1 | 1 | 0 | 2144 |
|                                                          |                                                                                                       | Multiple-behavior intervention | 4 | 2 | 2 | 2151 |
| Koniak-Griffin et al. (2008)                             | To assess the effectiveness of a couple-focused HIV prevention program                                | Control                        | 0 | 0 | 0 | 36   |
|                                                          |                                                                                                       | Multiple-behavior intervention | 2 | 2 | 0 | 30   |
| Konkle-Parker, Erlen, Dubbert & May (2012)               | To test an adherence intervention guided by the Information-Motivation-Behavioral Skills model        | Control                        | 0 | 0 | 0 | 28   |
|                                                          |                                                                                                       | Multiple-behavior intervention | 4 | 2 | 2 | 33   |
| Landon, Wilson, Mcinnes, Landrum & Hirschhorn (2004)     | To evaluate a multi-institution collaborative program to improve the quality of care for HIV patients | Control                        | 0 | 0 | 0 | 1761 |
|                                                          |                                                                                                       | Multiple-behavior intervention | 3 | 2 | 1 | 3190 |
| Lapinski, Randall, Peterson, Peterson & Klein (2009)     | To determine the effect of a health communication intervention, Prevention Options for Positives      | Multiple-behavior intervention | 3 | 2 | 1 | 48   |
|                                                          |                                                                                                       | Multiple-behavior intervention | 3 | 2 | 1 | 24   |
|                                                          |                                                                                                       | Control                        | 0 | 0 | 0 | 179  |

|                                             |                                                                                                                           |                                |   |   |   |     |
|---------------------------------------------|---------------------------------------------------------------------------------------------------------------------------|--------------------------------|---|---|---|-----|
| Larsson, Eurenus, Westerling & Tydén (2006) | To investigate an intervention for high school students                                                                   | Multiple-behavior intervention | 4 | 2 | 2 | 282 |
| Latkin et al. (2009)                        | To test the efficacy of a network intervention to promote HIV risk reduction                                              | Multiple-behavior intervention | 4 | 2 | 2 | 573 |
|                                             |                                                                                                                           | Multiple-behavior intervention | 4 | 2 | 2 | 550 |
| Lau, Lau, Cheung & Tsui (2008)              | To see how effective an internet-based intervention is at reducing HIV risk behavior                                      | Multiple-behavior intervention | 4 | 2 | 2 | 238 |
|                                             |                                                                                                                           | Multiple-behavior intervention | 4 | 2 | 2 | 237 |
| Lau, Tsui, Cheng & Pang (2010)              | To determine the efficacy of voluntary counseling + testing + information approach for promoting HIV preventive behaviors | Multiple-behavior intervention | 2 | 2 | 0 | 154 |
|                                             |                                                                                                                           | Multiple-behavior intervention | 5 | 2 | 3 | 147 |
| Lauby, Smith, Stark, Person & Adams (2000)  | To test the effects of a multi-site community-level HIV prevention intervention                                           | Control                        | 0 | 0 | 0 | 951 |
|                                             |                                                                                                                           | Multiple-behavior intervention | 2 | 2 | 0 | 883 |
| Lauby et al. (2010)                         | To investigate the efficacy of a theater-based HIV prevention intervention program                                        | Multiple-behavior intervention | 3 | 2 | 1 | 143 |
|                                             |                                                                                                                           | Multiple-behavior intervention | 3 | 2 | 1 | 146 |
| Letourneau, McCart, Sheidow & Mauro (2017)  | To evaluate a contingency management intervention addressing adolescent substance use and sexual risk behaviors           | Multiple-behavior intervention | 2 | 2 | 0 | 62  |
|                                             |                                                                                                                           | Multiple-behavior intervention | 9 | 2 | 7 | 45  |
| Lewis, Rivera,                              | To assess the impact of an intervention to reduce                                                                         | Single-behavior intervention   | 1 | 1 | 0 | 394 |



|                                                                 |                                                                                                                                                    |                                   |   |   |   |      |
|-----------------------------------------------------------------|----------------------------------------------------------------------------------------------------------------------------------------------------|-----------------------------------|---|---|---|------|
| Crawford,<br>Decuir &<br>Amesty<br>(2015)                       | injection drug risk among<br>users                                                                                                                 | Multiple-behavior<br>intervention | 3 | 2 | 1 | 359  |
| Lin et al.<br>(2010)                                            | To identify the efficacy of a<br>motivation theory-based HIV<br>prevention intervention                                                            | Control                           | 0 | 0 | 0 | 100  |
|                                                                 |                                                                                                                                                    | Multiple-behavior<br>intervention | 6 | 2 | 4 | 200  |
| Lloyd-<br>Richardson<br>et al. (2009)                           | To test the efficacy of two<br>smoking cessation<br>interventions in an HIV-<br>positive sample                                                    | Multiple-behavior<br>intervention | 2 | 2 | 0 | 232  |
|                                                                 |                                                                                                                                                    | Multiple-behavior<br>intervention | 4 | 2 | 2 | 212  |
| Lugada et al.<br>(2010)                                         | To compare HIV counseling<br>and testing uptake among<br>household members of<br>patients receiving<br>antiretroviral therapy                      | Multiple-behavior<br>intervention | 2 | 2 | 0 | 4798 |
|                                                                 |                                                                                                                                                    | Multiple-behavior<br>intervention | 2 | 2 | 0 | 2386 |
| Lutalo et al.<br>(2010)                                         | To assess the effects of a<br>family planning outreach<br>program                                                                                  | Control                           | 0 | 0 | 0 | 3574 |
|                                                                 |                                                                                                                                                    | Multiple-behavior<br>intervention | 2 | 2 | 0 | 6720 |
| Marsch et al.<br>(2015)                                         | To test the comparative<br>effectiveness of two<br>interventions                                                                                   | Control                           | 0 | 0 | 0 | 72   |
|                                                                 |                                                                                                                                                    | Single-behavior<br>intervention   | 1 | 1 | 0 | 69   |
| Martin,<br>O'Connell,<br>Inciardi,<br>Surratt &<br>Beard (2003) | To investigate the results<br>from a brief intervention for<br>probationers                                                                        | Multiple-behavior<br>intervention | 5 | 2 | 3 | 369  |
|                                                                 |                                                                                                                                                    | Multiple-behavior<br>intervention | 5 | 2 | 3 | 385  |
| Mathews et<br>al. (2016)                                        | To investigate the effects of<br>a multi-component, school-<br>based HIV prevention<br>intervention to delay sexual<br>debut, increase condom use, | Control                           | 0 | 0 | 0 | 1703 |
|                                                                 |                                                                                                                                                    | Multiple-behavior<br>intervention | 4 | 2 | 2 | 1748 |

|                                                       |                                                                                                                                                                 |                                |   |   |   |     |
|-------------------------------------------------------|-----------------------------------------------------------------------------------------------------------------------------------------------------------------|--------------------------------|---|---|---|-----|
|                                                       | and decrease intimate partner violence among adolescents                                                                                                        |                                |   |   |   |     |
| Mausbach, Semple, Strathdee, Zians & Patterson (2007) | To examine the efficacy of a behavioral intervention emphasizing motivational interviewing and social cognitive theory                                          | Multiple-behavior intervention | 3 | 2 | 1 | 150 |
|                                                       |                                                                                                                                                                 | Multiple-behavior intervention | 4 | 2 | 2 | 149 |
|                                                       |                                                                                                                                                                 | Multiple-behavior intervention | 4 | 2 | 2 | 152 |
| McCusker et al. (1997)                                | To see the effects of drug treatment duration on recovery and HIV risk behavior                                                                                 | Multiple-behavior intervention | 5 | 2 | 3 | 444 |
|                                                       |                                                                                                                                                                 | Multiple-behavior intervention | 7 | 2 | 5 | 184 |
| McMahon, Malow, Jennings & Gomez (2001)               | To evaluate the effects of a cognitive-behavioral HIV prevention intervention                                                                                   | Multiple-behavior intervention | 3 | 2 | 1 | 152 |
|                                                       |                                                                                                                                                                 | Multiple-behavior intervention | 7 | 2 | 5 | 160 |
| Meade et al. (2010)                                   | To test a group coping intervention in reducing substance use                                                                                                   | Multiple-behavior intervention | 2 | 2 | 0 | 124 |
|                                                       |                                                                                                                                                                 | Multiple-behavior intervention | 2 | 2 | 0 | 123 |
| Monti et al. (2016)                                   | To investigate the efficacy of a single session motivational intervention for reducing heavy drinking and condomless sex in adult emergency department patients | Multiple-behavior intervention | 2 | 2 | 0 | 188 |
|                                                       |                                                                                                                                                                 | Multiple-behavior intervention | 3 | 2 | 1 | 184 |
| Moultapa, Watson, McCuller, Reiber & Tsai (2009)      | To assess an intervention targeting substance use and HIV prevention                                                                                            | Multiple-behavior intervention | 3 | 2 | 1 | 33  |
|                                                       |                                                                                                                                                                 | Multiple-behavior intervention | 9 | 2 | 7 | 33  |

|                                                    |                                                                                                                     |                                |   |   |   |     |
|----------------------------------------------------|---------------------------------------------------------------------------------------------------------------------|--------------------------------|---|---|---|-----|
| Mugusi et al. (2009)                               | To evaluate various strategies aimed at improving adherence to antiretroviral therapy                               | Multiple-behavior intervention | 5 | 2 | 3 | 312 |
|                                                    |                                                                                                                     | Multiple-behavior intervention | 6 | 2 | 4 | 242 |
|                                                    |                                                                                                                     | Multiple-behavior intervention | 6 | 2 | 4 | 67  |
| Murphy, Chen, Naar-King & Parsons (2012)           | To investigate a motivational interviewing intervention targeting multiple risk behaviors                           | Control                        | 0 | 0 | 0 | 75  |
|                                                    |                                                                                                                     | Multiple-behavior intervention | 3 | 2 | 1 | 68  |
| Njuguna et al. (2016)                              | To test the effect of an SMS intervention on HIV testing uptake                                                     | Single-behavior intervention   | 1 | 1 | 0 | 300 |
|                                                    |                                                                                                                     | Multiple-behavior intervention | 4 | 2 | 2 | 300 |
| Nöstlinger et al. (2016)                           | To determine the efficacy of a computer-assisted intervention to improve safer sex practices                        | Single-behavior intervention   | 1 | 1 | 0 | 57  |
|                                                    |                                                                                                                     | Multiple-behavior intervention | 5 | 2 | 3 | 55  |
| Parsons, Golub, Rosof & Holder (2007)              | To determine the efficacy of a behavioral intervention designed to improve adherence and reduce alcohol consumption | Multiple-behavior intervention | 3 | 2 | 1 | 78  |
|                                                    |                                                                                                                     | Multiple-behavior intervention | 9 | 2 | 7 | 65  |
| Parsons, Lelutiu-Weinberger, Botsko & Golub (2014) | To test a brief motivational interviewing intervention on HIV risk and drug use                                     | Multiple-behavior intervention | 2 | 2 | 0 | 70  |
|                                                    |                                                                                                                     | Multiple-behavior intervention | 2 | 2 | 0 | 73  |
| Peltzer, Simbayi, Banyini &                        | To evaluate a brief HIV risk reduction counselling intervention                                                     | Multiple-behavior intervention | 4 | 2 | 2 | 75  |
|                                                    |                                                                                                                     | Multiple-behavior intervention | 4 | 2 | 2 | 75  |

|                                                                      |                                                                                                                   |                                   |   |   |   |     |
|----------------------------------------------------------------------|-------------------------------------------------------------------------------------------------------------------|-----------------------------------|---|---|---|-----|
| Kekana<br>(2012)                                                     |                                                                                                                   |                                   |   |   |   |     |
| Peragallo,<br>Gonzalez-<br>Guarda,<br>McCabe &<br>Cianelli<br>(2012) | To assess the efficacy of an<br>HIV risk reduction<br>intervention                                                | Multiple-behavior<br>intervention | 5 | 2 | 3 | 274 |
|                                                                      |                                                                                                                   | Control                           | 0 | 0 | 0 | 274 |
| Pettifor et al.<br>(2015)                                            | To test a motivational<br>interviewing-based<br>counseling intervention for<br>people with acute HIV<br>infection | Multiple-behavior<br>intervention | 3 | 2 | 1 | 14  |
|                                                                      |                                                                                                                   | Multiple-behavior<br>intervention | 4 | 2 | 2 | 14  |
| Pop-Eleches<br>et al. (2011)                                         | To evaluate the effect of text<br>message reminders on<br>adherence                                               | Control                           | 0 | 0 | 0 | 139 |
|                                                                      |                                                                                                                   | Single-behavior<br>intervention   | 1 | 1 | 0 | 73  |
|                                                                      |                                                                                                                   | Single-behavior<br>intervention   | 1 | 1 | 0 | 72  |
|                                                                      |                                                                                                                   | Single-behavior<br>intervention   | 1 | 1 | 0 | 70  |
|                                                                      |                                                                                                                   | Single-behavior<br>intervention   | 1 | 1 | 0 | 74  |
| Purcell et al.<br>(2007)                                             | To identify the effect of a<br>peer-mentoring intervention<br>for HIV-seropositive IDUs                           | Multiple-behavior<br>intervention | 4 | 2 | 2 | 480 |
|                                                                      |                                                                                                                   | Multiple-behavior<br>intervention | 6 | 2 | 4 | 486 |
| Reback, et al.<br>(2010)                                             | To evaluate contingency<br>management among<br>homeless men                                                       | Multiple-behavior<br>intervention | 2 | 2 | 0 | 67  |
|                                                                      |                                                                                                                   | Multiple-behavior<br>intervention | 5 | 2 | 3 | 64  |
| Rhodes et al.<br>(2017)                                              | To evaluate a Spanish-<br>language, small-group HIV<br>prevention intervention                                    | Control                           | 0 | 0 | 0 | 152 |
|                                                                      |                                                                                                                   | Multiple-behavior<br>intervention | 3 | 2 | 1 | 152 |

|                                                       |                                                                                                                                                                      |                                |    |   |   |      |
|-------------------------------------------------------|----------------------------------------------------------------------------------------------------------------------------------------------------------------------|--------------------------------|----|---|---|------|
|                                                       | designed to increase condom use and HIV testing among Hispanic/Latino gay, bisexual, and other men who have sex with men                                             |                                |    |   |   |      |
| Richardson et al. (2004)                              | To assess the efficacy of a brief safer-sex counseling program                                                                                                       | Single-behavior intervention   | 1  | 1 | 0 | 172  |
|                                                       |                                                                                                                                                                      | Single-behavior intervention   | 1  | 1 | 0 | 210  |
|                                                       |                                                                                                                                                                      | Multiple-behavior intervention | 3  | 2 | 1 | 190  |
| Robles et al. (2004)                                  | To examine the effectiveness of a combined counseling and case management behavioral intervention in reducing HIV risk behaviors among Hispanic injection drug users | Multiple-behavior intervention | 7  | 2 | 5 | 293  |
|                                                       |                                                                                                                                                                      | Multiple-behavior intervention | 11 | 2 | 9 | 285  |
| Rongkavilit et al. (2013)                             | To demonstrate the effect of motivational interviewing                                                                                                               | Multiple-behavior intervention | 4  | 2 | 2 | 53   |
|                                                       |                                                                                                                                                                      | Multiple-behavior intervention | 4  | 2 | 2 | 55   |
| Rotheram-Borus, Li, Liang, Wen & Wu (2011)            | To assess the effects of a community population opinion leader intervention                                                                                          | Multiple-behavior intervention | 4  | 2 | 2 | 1956 |
|                                                       |                                                                                                                                                                      | Multiple-behavior intervention | 7  | 2 | 5 | 1956 |
| Rotheram-Borus, Murphy, Fernandez & Srinivasan (1998) | To investigate a brief HIV intervention                                                                                                                              | Single-behavior intervention   | 1  | 1 | 0 | 75   |
|                                                       |                                                                                                                                                                      | Multiple-behavior intervention | 5  | 2 | 3 | 64   |

|                                                  |                                                                                                                                       |                                |   |   |   |     |
|--------------------------------------------------|---------------------------------------------------------------------------------------------------------------------------------------|--------------------------------|---|---|---|-----|
| Roux et al. (2015)                               | To determine the efficacy of an educational intervention on drug use risk                                                             | Multiple-behavior intervention | 2 | 2 | 0 | 127 |
|                                                  |                                                                                                                                       | Control                        | 0 | 0 | 0 | 113 |
| Rowe et al. (2016)                               | To assess a family-based HIV/STI prevention approach                                                                                  | Multiple-behavior intervention | 5 | 2 | 3 | 78  |
|                                                  |                                                                                                                                       | Multiple-behavior intervention | 8 | 2 | 6 | 76  |
| Sales, Lang, Hardin, Diclemente & Wingood (2010) | To test the efficacy of an HIV prevention intervention                                                                                | Multiple-behavior intervention | 2 | 2 | 0 | 119 |
|                                                  |                                                                                                                                       | Multiple-behavior intervention | 8 | 2 | 6 | 126 |
| Samet et al. (2008)                              | To demonstrate the effectiveness of a sexual risk reduction intervention                                                              | Multiple-behavior intervention | 4 | 2 | 2 | 87  |
|                                                  |                                                                                                                                       | Control                        | 0 | 0 | 0 | 94  |
| Samet et al. (2015)                              | To assess the efficacy of an HIV prevention intervention in decreasing STIs                                                           | Multiple-behavior intervention | 3 | 2 | 1 | 350 |
|                                                  |                                                                                                                                       | Multiple-behavior intervention | 7 | 2 | 5 | 350 |
| Santos et al. (2014)                             | To evaluate an adapted brief counseling intervention designed to reduce HIV risk behavior at its ability to also reduce substance use | Control                        | 0 | 0 | 0 | 164 |
|                                                  |                                                                                                                                       | Multiple-behavior intervention | 2 | 2 | 0 | 162 |
| Sellers, McGraw & McKinlay (1994)                | To test whether the distribution of condoms increases teen sexual activity                                                            | Multiple-behavior intervention | 2 | 2 | 0 | 293 |
|                                                  |                                                                                                                                       | Control                        | 0 | 0 | 0 | 293 |
| Sorensen et al. (2007)                           | To evaluate a contingency management intervention designed to improve adherence                                                       | Multiple-behavior intervention | 6 | 2 | 4 | 33  |
|                                                  |                                                                                                                                       | Multiple-behavior intervention | 6 | 2 | 4 | 33  |

|                                                     |                                                                                                              |                                |   |   |   |     |
|-----------------------------------------------------|--------------------------------------------------------------------------------------------------------------|--------------------------------|---|---|---|-----|
| St. Lawrence et al. (1997)                          | To compare an intervention based on social cognitive theory with one based on the theory of gender and power | Multiple-behavior intervention | 4 | 2 | 2 | 45  |
|                                                     |                                                                                                              | Multiple-behavior intervention | 7 | 2 | 5 | 45  |
| St. Lawrence, Jefferson, Alleyne & Brasfield (1995) | To compare a behavioral skills training intervention with an educational program                             | Multiple-behavior intervention | 2 | 2 | 0 | 17  |
|                                                     |                                                                                                              | Multiple-behavior intervention | 4 | 2 | 2 | 17  |
| Stephenson et al. (2011)                            | To examine a contraceptive method uptake                                                                     | Multiple-behavior intervention | 4 | 2 | 2 | 370 |
|                                                     |                                                                                                              | Multiple-behavior intervention | 5 | 2 | 3 | 374 |
|                                                     |                                                                                                              | Multiple-behavior intervention | 5 | 2 | 3 | 393 |
|                                                     |                                                                                                              | Multiple-behavior intervention | 6 | 2 | 4 | 365 |
| Stewart et al. (2017)                               | To investigate an evidence-based risk reduction program on cocaine users                                     | Multiple-behavior intervention | 2 | 2 | 0 | 139 |
|                                                     |                                                                                                              | Multiple-behavior intervention | 5 | 2 | 3 | 112 |
| Surratt & Inciardi (2010)                           | To evaluate two interventions on change in risk behavior                                                     | Multiple-behavior intervention | 3 | 2 | 1 | 396 |
|                                                     |                                                                                                              | Multiple-behavior intervention | 6 | 2 | 4 | 410 |
| Thato, Jenkins & Dusitsin (2008)                    | To assess the effects of a culturally sensitive sex education program                                        | Control                        | 0 | 0 | 0 | 261 |
|                                                     |                                                                                                              | Multiple-behavior intervention | 2 | 2 | 0 | 261 |
| Thomas, Reynolds, Alterescu,                        | To assess the efficacy of an organizational network strengthening approach                                   | Control                        | 0 | 0 | 0 | 225 |
|                                                     |                                                                                                              | Single-behavior intervention   | 1 | 1 | 0 | 234 |

|                                                 |                                                                                                                                                         |                                |   |   |   |     |
|-------------------------------------------------|---------------------------------------------------------------------------------------------------------------------------------------------------------|--------------------------------|---|---|---|-----|
| Bevc & Tsegaye (2016)                           |                                                                                                                                                         |                                |   |   |   |     |
| Thurman, Kidman, Carton & Chiroro (2016)        | To evaluate psychological and behavioral interventions                                                                                                  | Multiple-behavior intervention | 2 | 2 | 0 | 229 |
|                                                 |                                                                                                                                                         | Multiple-behavior intervention | 6 | 2 | 4 | 260 |
|                                                 |                                                                                                                                                         | Multiple-behavior intervention | 8 | 2 | 6 | 243 |
|                                                 |                                                                                                                                                         | Control                        | 0 | 0 | 0 | 282 |
| Tobin et al. (2017)                             | To see the effect of an integrated cognitive behavioral therapy and HIV prevention intervention in reducing depressive symptoms and risky HIV behaviors | Control                        | 0 | 0 | 0 | 153 |
|                                                 |                                                                                                                                                         | Multiple-behavior intervention | 4 | 2 | 2 | 162 |
| Tucker, D'Amico, Ewing, Miles & Pedersen (2017) | To evaluate a four-session, group-based motivational interviewing intervention to reduce alcohol and other drug use                                     | Multiple-behavior intervention | 6 | 2 | 4 | 100 |
|                                                 |                                                                                                                                                         | Control                        | 0 | 0 | 0 | 100 |
| Wandera et al. (2017)                           | To investigate the efficacy of a brief motivational intervention counseling in reducing alcohol consumption among people living with HIV/AIDS           | Multiple-behavior intervention | 5 | 2 | 3 | 170 |
| Wang et al. (2010)                              | To determine the effect of a nurse-delivered home visits & telephone calls on adherence                                                                 | Single-behavior intervention   | 1 | 1 | 0 | 50  |
|                                                 |                                                                                                                                                         | Multiple-behavior intervention | 5 | 2 | 3 | 58  |
|                                                 |                                                                                                                                                         | Control                        | 0 | 0 | 0 | 448 |



|                                                 |                                                                                                                         |                                |    |   |    |     |
|-------------------------------------------------|-------------------------------------------------------------------------------------------------------------------------|--------------------------------|----|---|----|-----|
| Wawer et al. (2009)                             | To determine whether circumcision in HIV-infected individuals would reduce transmission of the virus to sexual partners | Multiple-behavior intervention | 4  | 2 | 2  | 474 |
| Wechsberg, Luseno, Lam, Parry & Morojele (2006) | To determine the effect of an HIV prevention intervention                                                               | Multiple-behavior intervention | 4  | 2 | 2  | 46  |
|                                                 |                                                                                                                         | Multiple-behavior intervention | 5  | 2 | 3  | 47  |
| Wechsberg et al. (2016)                         | To examine the effects of the Couples Health CoOp intervention on heavy drinking, condom use, and HIV incidence         | Multiple-behavior intervention | 4  | 2 | 2  | 200 |
|                                                 |                                                                                                                         | Multiple-behavior intervention | 4  | 2 | 2  | 200 |
|                                                 |                                                                                                                         | Multiple-behavior intervention | 4  | 2 | 2  | 200 |
| Wernette, Plegue, Kahler, Sen & Zlotnick (2018) | To evaluate a computer-delivered brief intervention for substance use and risky sex during pregnancy                    | Control                        | 0  | 0 | 0  | 19  |
|                                                 |                                                                                                                         | Multiple-behavior intervention | 2  | 2 | 0  | 31  |
| Williams, Myles, Sperling & Carey (2018)        | To investigate whether a prevention intervention tailored for post-incarcerated men in reducing sexual risk             | Control                        | 0  | 0 | 0  | 125 |
|                                                 |                                                                                                                         | Multiple-behavior intervention | 4  | 2 | 2  | 130 |
| Wolitski, Gómez & Parsons (2005)                | To assess the effects of a peer-led intervention on transmission risk behavior                                          | Multiple-behavior intervention | 2  | 2 | 0  | 413 |
|                                                 |                                                                                                                         | Multiple-behavior intervention | 5  | 2 | 3  | 413 |
| Zule, Costenbader, Coomes &                     | To compare the effects of two interventions on risky behaviors                                                          | Multiple-behavior intervention | 10 | 2 | 8  | 428 |
|                                                 |                                                                                                                         | Multiple-behavior intervention | 12 | 2 | 10 | 423 |

Wechsberg  
(2009)

---

*Note.*

<sup>a</sup> The designation of a group as a control, single-behavior intervention, or multiple-behavior intervention was based on the number of recommendations prescribed to that group.

## APPENDIX D

## Outcomes measured in this meta-analysis

| <b>Categories</b>      | <b>Outcomes</b>                                                                                                                                                                                                                                                                                                                |
|------------------------|--------------------------------------------------------------------------------------------------------------------------------------------------------------------------------------------------------------------------------------------------------------------------------------------------------------------------------|
| Risk Reduction         |                                                                                                                                                                                                                                                                                                                                |
| Sexual Risk            | Safe sex strategies<br>Condom-protected sexual intercourse<br>Condom use with your non-spousal partner<br>Contraceptives other than condoms<br>Unprotected sexual intercourse<br>Multiple partners<br>Sex and drinking<br>Sex for drugs<br>Sex for money<br>Drugs for sex<br>Unwanted pregnancy<br>STI rates<br>HIV prevalence |
| Substance-Related Risk | Substance use (e.g., alcohol use, drug use)<br>Managing harmful consequences of alcohol use<br>Sharing needles                                                                                                                                                                                                                 |
| Testing                | HIV testing<br>STI testing                                                                                                                                                                                                                                                                                                     |
| Treatment              | Use of services<br>Intervention attendance<br>HIV treatment<br>STI treatment<br>Drug treatment<br>Medication adherence<br>Biological variables (e.g., CD4 counts, viral loads)<br>Serological follow-up<br>Mortality rates                                                                                                     |
| Psychosocial Health    | Mental health (e.g., depression)<br>Gender violence<br>Past year physical and/or sexual IPV<br>School dropout<br>Quality of life (physical, psychological, social, and environmental)                                                                                                                                          |

*Note.* Effect sizes were coded such that positive scores represented improvements (e.g., increase in treatment adherence, decrease in drug use)

## APPENDIX E

## Coding exploratory study characteristics

**Description of the report.** We coded report characteristics, including the (a) publication year, (b) first authors' institution (e.g., college, hospital, research center), (c) first authors' institutional area (e.g., psychology, public health, medicine), (d) source type (e.g., journal article, dissertation), (e) location of the intervention, and (f) language the report was communicated in.

**Demographic and participant characteristics.** We also coded for characteristics of the sample, including the (a) sample size, (b) percentage of males in each group, (c) lowest, highest, and mean age, (d) percentage of participants of European, African, Latin, Asian, and Native American descent, (e) percentage of participants who completed high school and their mean years of education, and (f) percentage of participants who identified as heterosexual, gay, and bisexual.

We further coded for factors related to the intervention participants. We coded reports for (a) the specific sample targeted in the intervention (e.g., intravenous drug users), and recoded this variable to indicate whether the intervention targeted a vulnerable vs. not vulnerable populations (World Health Organization, 2015). We also coded for whether the intervention was (b) targeted to a specific ethnic group or (c) a specific gender group, and (d) whether the sample was self-selected, indicated by whether participation in the intervention was voluntary or whether the intervention made use of a captive audience (e.g., prison inmates).

**Intervention characteristics.** Finally, we coded for characteristics of the intervention programs. We coded for factors related to the design of the intervention, including (a) whether participants were randomly assigned to the intervention and control groups and (b) the mean number of days between the intervention and posttest. We also coded for factors related to the

implementation of these interventions. Specifically, we classified each intervention group according to (a) where participants were recruited (e.g., drug treatment facility, social service agency), and recoded this variable to describe a hospital/clinical setting vs. a non-hospital/clinical setting, (b) whether the facilitator was a professional (e.g., physician, nurse, social worker, professional counselor) or lay community member (e.g., community leaders and peers), (c) whether the intervention was delivered to a group, to individuals, or to a combination of the two, (d) what the exposure format (e.g., radio, brochure) was, which was recoded to indicate face-to-face vs. other formats, and (e) what the exposure setting (e.g., school, community) was, which was recoded to represent a clinical vs. non-clinical setting. We also determined (f) whether the intervention was described as culturally appropriate, (g) whether the intervention made use of active (e.g., behavioral skills training) or passive (e.g., informational arguments) strategies (Albarracin et al., 2005), and (h) whether the intervention relied on attitudinal elements (e.g., attitudinal arguments, threat arguments), motivational elements (e.g., feedback, encouragement), or skills training elements (e.g., role playing, goal setting) (Michie et al., 2015).

## APPENDIX F

## Descriptive statistics

| Variable                               | Cases ( <i>k</i> = 136) |
|----------------------------------------|-------------------------|
| <b>General report characteristics</b>  |                         |
| Publication year ( <i>r</i> = 1)       |                         |
| M(SD)                                  | 2009.15(5.82)           |
| <i>k</i>                               | 125                     |
| Source type ( $\kappa$ = 1)            |                         |
| Journal article                        | 98.5(134)               |
| Academic affiliation ( $\kappa$ = .91) |                         |
| University                             | 27.9(38)                |
| College                                | 30.1(41)                |
| Research center                        | 14.7(20)                |
| Hospital or health service             | 3.7(5)                  |
| CDC                                    | 0.7(1)                  |
| Medical School                         | 2.9(4)                  |
| Institutional area ( $\kappa$ = 1)     |                         |
| Psychology                             | 12.5(17)                |
| Community/public health                | 26.5(36)                |
| Medicine                               | 33.8(46)                |
| Epidemiology                           | 5.9(8)                  |
| Sociology                              | 1.5(2)                  |
| Social work                            | 1.5(2)                  |
| Language of the report ( $\kappa$ = 1) |                         |
| English                                | 100.0(136)              |
| <b>Demographic characteristics</b>     |                         |
| Sample size ( <i>r</i> = 1)            |                         |
| Sum total                              | 59330                   |
| M(SD)                                  | 439.48(1050.23)         |
| <i>k</i>                               | 135                     |
| % men ( <i>r</i> = 1)                  |                         |
| M(SD)                                  | 58.40(35.79)            |
| <i>k</i>                               | 130                     |
| % women ( <i>r</i> = 1)                |                         |
| M(SD)                                  | 41.07(35.66)            |
| <i>k</i>                               | 129                     |
| Age in years ( <i>r</i> = 1)           |                         |
| M(SD)                                  | 30.03(10.38)            |
| <i>k</i>                               | 96                      |
| % heterosexual ( <i>r</i> = 1)         |                         |
| M(SD)                                  | 44.89(43.19)            |
| <i>k</i>                               | 38                      |

| <b>Variable</b>                               | <b>Cases (<math>k = 136</math>)</b> |
|-----------------------------------------------|-------------------------------------|
| % gay or bisexual ( $r = 1$ )                 |                                     |
| M(SD)                                         | 56.52(43.87)                        |
| <i>k</i>                                      | 36                                  |
| Ethnic descent <sup>a</sup>                   |                                     |
| % American ( $r = 1$ )                        |                                     |
| M(SD)                                         | 21.13(27.79)                        |
| <i>k</i>                                      | 107                                 |
| % African American ( $r = 1$ )                |                                     |
| M(SD)                                         | 36.02(35.60)                        |
| <i>k</i>                                      | 110                                 |
| % Latin American ( $r = 1$ )                  |                                     |
| M(SD)                                         | 14.66(24.15)                        |
| <i>k</i>                                      | 105                                 |
| % Asian ( $r = 1$ )                           |                                     |
| M(SD)                                         | 3.67(16.74)                         |
| <i>k</i>                                      | 86                                  |
| % Native American Indian ( $r = 1$ )          |                                     |
| M(SD)                                         | 0.36(1.10)                          |
| <i>k</i>                                      | 87                                  |
| % high school graduates ( $r = 1$ )           |                                     |
| M(SD)                                         | 39.81(30.84)                        |
| <i>k</i>                                      | 71                                  |
| <b>Participant characteristics</b>            |                                     |
| Sample targeted by gender ( $\kappa = 1$ )    |                                     |
| Yes                                           | 41.9(57)                            |
| No                                            | 54.4(74)                            |
| Sample targeted by ethnicity ( $\kappa = 1$ ) |                                     |
| Yes                                           | 18.4(25)                            |
| No                                            | 77.9(106)                           |
| Targeted sample ( $\kappa = 1$ )              |                                     |
| HIV positive                                  | 18.4(25)                            |
| Intravenous drug user                         | 5.9(8)                              |
| Drug dependent                                | 8.8(12)                             |
| Men having sex with men                       | 6.6(9)                              |
| Female sex workers                            | 1.5(2)                              |
| Prison inmates                                | 2.9(4)                              |
| Women                                         | 3.7(5)                              |
| African American women                        | 2.2(3)                              |
| College students                              | 1.5(2)                              |
| Middle school students                        | 1.5(2)                              |
| Combination                                   | 11.8(16)                            |
| Self-selected sample ( $\kappa = 1$ )         |                                     |
| Yes                                           | 81.6(111)                           |

| <b>Variable</b>                           | <b>Cases (<math>k = 136</math>)</b> |
|-------------------------------------------|-------------------------------------|
| No <sub>b</sub>                           | 15.4(21)                            |
| Both                                      | 0.7(1)                              |
| <b>Intervention characteristics</b>       |                                     |
| Recruitment context ( $\kappa = 1$ )      |                                     |
| Hospital/health clinic                    | 38.2(52)                            |
| Drug treatment                            | 8.1(11)                             |
| Social service                            | 2.9(4)                              |
| Bar                                       | 4.4(6)                              |
| Street                                    | 4.4(6)                              |
| Classroom                                 | 4.4(6)                              |
| Phone                                     | 0.7(1)                              |
| Multiple                                  | 12.5(17)                            |
| Random assignment ( $\kappa = .97$ )      |                                     |
| Yes                                       | 83.8(114)                           |
| No                                        | 12.5(17)                            |
| Exposure setting ( $\kappa = 1$ )         |                                     |
| Health clinic                             | 37.5(51)                            |
| Community                                 | 13.2(18)                            |
| Schools                                   | 4.4(6)                              |
| Street                                    | 0.7(1)                              |
| Mass media                                | 0.7(1)                              |
| Multiple contexts                         | 7.4(10)                             |
| Delivery medium ( $\kappa = .97$ )        |                                     |
| Face-to-face                              | 79.4(108)                           |
| Software                                  | 2.2(3)                              |
| Internet                                  | 0.7(1)                              |
| Television                                | 3.7(5)                              |
| Radio                                     | 0.7(1)                              |
| Multiple context                          | 5.3(7)                              |
| Delivery format ( $\kappa = 1$ )          |                                     |
| Groups                                    | 37.5(51)                            |
| Individuals                               | 36.0(49)                            |
| Both                                      | 17.6(24)                            |
| Facilitator ( $\kappa = .93$ )            |                                     |
| Doctor/nurse                              | 14.0(19)                            |
| Public health educator                    | 19.9(27)                            |
| Clinical psychologist                     | 6.6(9)                              |
| Medical student                           | 0.7(1)                              |
| Community leader                          | 2.2(3)                              |
| Gay leader                                | 1.5(2)                              |
| Multiple                                  | 9.6(13)                             |
| Culturally appropriate ( $\kappa = .89$ ) |                                     |
| Yes                                       | 24.3(33)                            |



| <b>Variable</b>                                           | <b>Cases (<i>k</i> = 136)</b> |
|-----------------------------------------------------------|-------------------------------|
| No                                                        | 72.8(99)                      |
| Days between intervention and post-test ( <i>r</i> = .88) |                               |
| M(SD)                                                     | 21.56(112.84)                 |
| <i>k</i>                                                  | 44                            |

*Note.* Values are %(*n*) unless specified otherwise. *k* = number of reports. *r* = intercoder reliability for continuous variables.  $\kappa$  = intercoder reliability for categorical variables.

<sup>a</sup> reported for interventions conducted in North America, as these categories are not applicable to most other continents.

<sup>b</sup> includes captive audiences (e.g., participants recruited from a prison setting).

## APPENDIX G

## Data analytic plan

Our synthesis involved measuring change in outcomes between baseline and the first follow-up in experimental and control groups separately. Performing posttest comparisons between conditions is possible when one investigates the differences between a treatment and a control. However, we were interested in recommendation number. Such a comparison would have required a high level of imputation to estimate the impact of each recommendation number, higher than the norm for network meta-analyses (Caldwell et al., 2005; Glenny et al., 2005; Lumley, 2002). It was thus more appropriate to analyze change over time. Additionally, although many meta-analyses determine the efficacy of interventions relative to a control group, such an approach poses problems as well. As the type of control group used often varies between interventions (Karlsson & Bergmark, 2015), study outcome estimates are either based on an absolute comparison (when using a passive control group) or a relative comparison (when using an active control group), which can accordingly yield larger and smaller effects, respectively (Brookmeyer et al., 2016). Ascertaining intervention efficacy over time, with each individual serving as their own control, was therefore optimal.

To represent change over time, we followed the meta-analytic methods outlined in Borenstein and colleagues (2009), which involved subtracting the mean at posttest from the mean at pretest, and dividing the difference by the standard deviation of the difference scores. Effect sizes were also calculated from proportions, which involved first calculating odds ratios and then transforming those to  $d$ . For cases in which the proportion was equal to 0 or 1 at either posttest or pretest, we applied the correction from Sweeting and colleagues (2004), which involved adding 0.005 to (or subtracting 0.005 from) both pretest and posttest scores. We then

obtained the natural log of the odds ratio, and divided it by 1.81, to convert this effect size measure into a Cohen's  $d$  (Chin, 2000). Finally, effect sizes were also calculated from exact reports of  $t$  tests,  $F$  ratios, and  $p$  values.

Unless indicated otherwise, data analysis was conducted using the R-based *robumeta* package (Tanner-Smith & Tipton, 2014). We also used the R-based *metafor* package (Viechtbauer, 2010), which provided plot functions to assess model fit and test for inclusion/publication bias.

APPENDIX H

Funnel plot for reports included in the meta-analysis

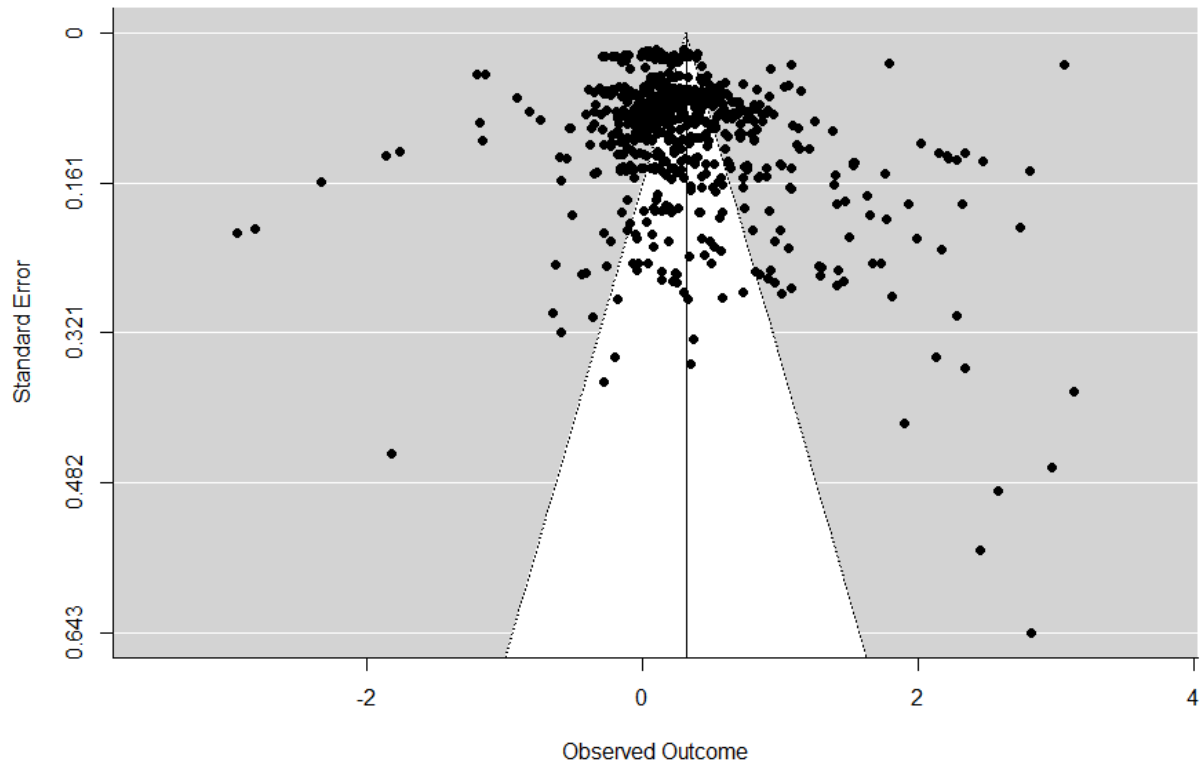

A funnel plot for reports included in this meta-analysis. A visual inspection of this funnel plot reveals a slight asymmetry, with studies missing on the left side.

## APPENDIX I

Results of intervention efficacy based on recommendation number

|                                           | Overall Outcome | Sexual Risk   | Outcome Type <i>B</i> ( <i>SE</i> ) |             |            |                     |
|-------------------------------------------|-----------------|---------------|-------------------------------------|-------------|------------|---------------------|
|                                           |                 |               | Substance-Related Risk              | Testing     | Treatment  | Psychosocial Health |
| <b>All recommendations included</b>       |                 |               |                                     |             |            |                     |
| Recommendation number linear              | 0.07(0.01)***   | 0.06(0.02)*** | 0.08(0.02)**                        | 0.11(0.10)  | 0.07(0.04) | 0.19(0.11)          |
| Recommendation number squared             | -0.01(0.01)     | -0.01(0.00)*  | 0.00(0.01)                          | -0.03(0.02) | 0.02(0.01) | -0.07(0.04)         |
| <b>Only main recommendations included</b> |                 |               |                                     |             |            |                     |
| Recommendation number linear              | 0.11(0.03)***   | 0.06(0.02)*** | 0.08(0.02)**                        | 0.11(0.10)  | 0.07(0.04) | 0.19(0.11)          |
| Recommendation number squared             | -0.02(0.01)     | -0.01(0.00)*  | 0.00(0.01)                          | -0.03(0.02) | 0.02(0.01) | -0.07(0.04)         |

*Note.* For some interventions, no auxiliary recommendations were given. In these cases, the estimated coefficient values are the same between all and main recommendations. *B* is the estimated coefficient. *SE* is the standard error.

\*  $p < .05$  \*\*  $p < .01$  \*\*\*  $p < .001$

APPENDIX J

The weighted-mean average of overall change for each recommendation number

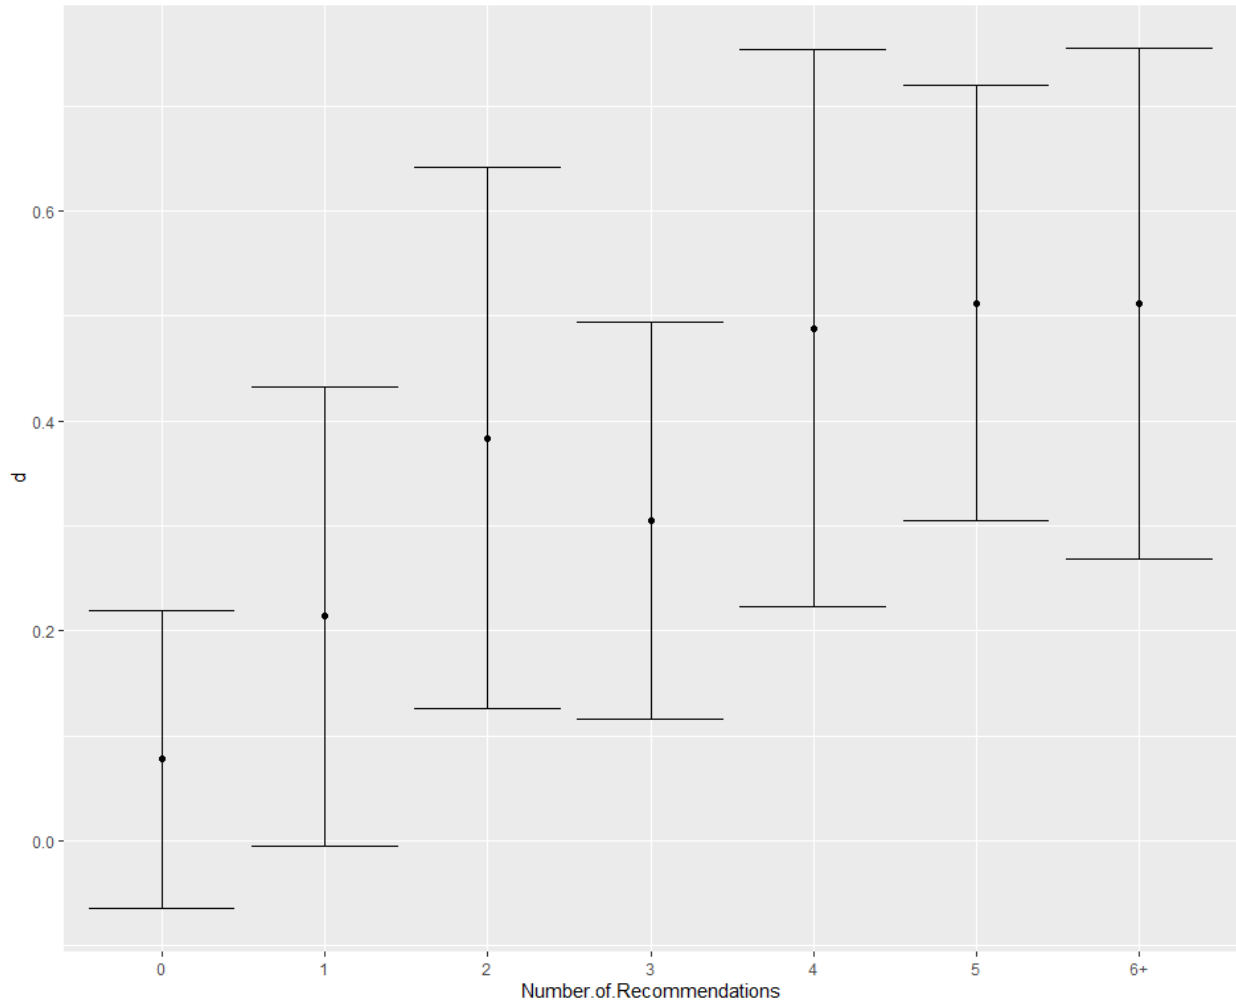

The weighted-mean average of overall change for each recommendation number.

Recommendation number was treated as a continuous variable in the meta-regression model. For plotting purposes, however, interventions recommending 6 to 14 recommendations were grouped together.

APPENDIX K

The weighted-mean average of overall change for each recommendation number for outcomes

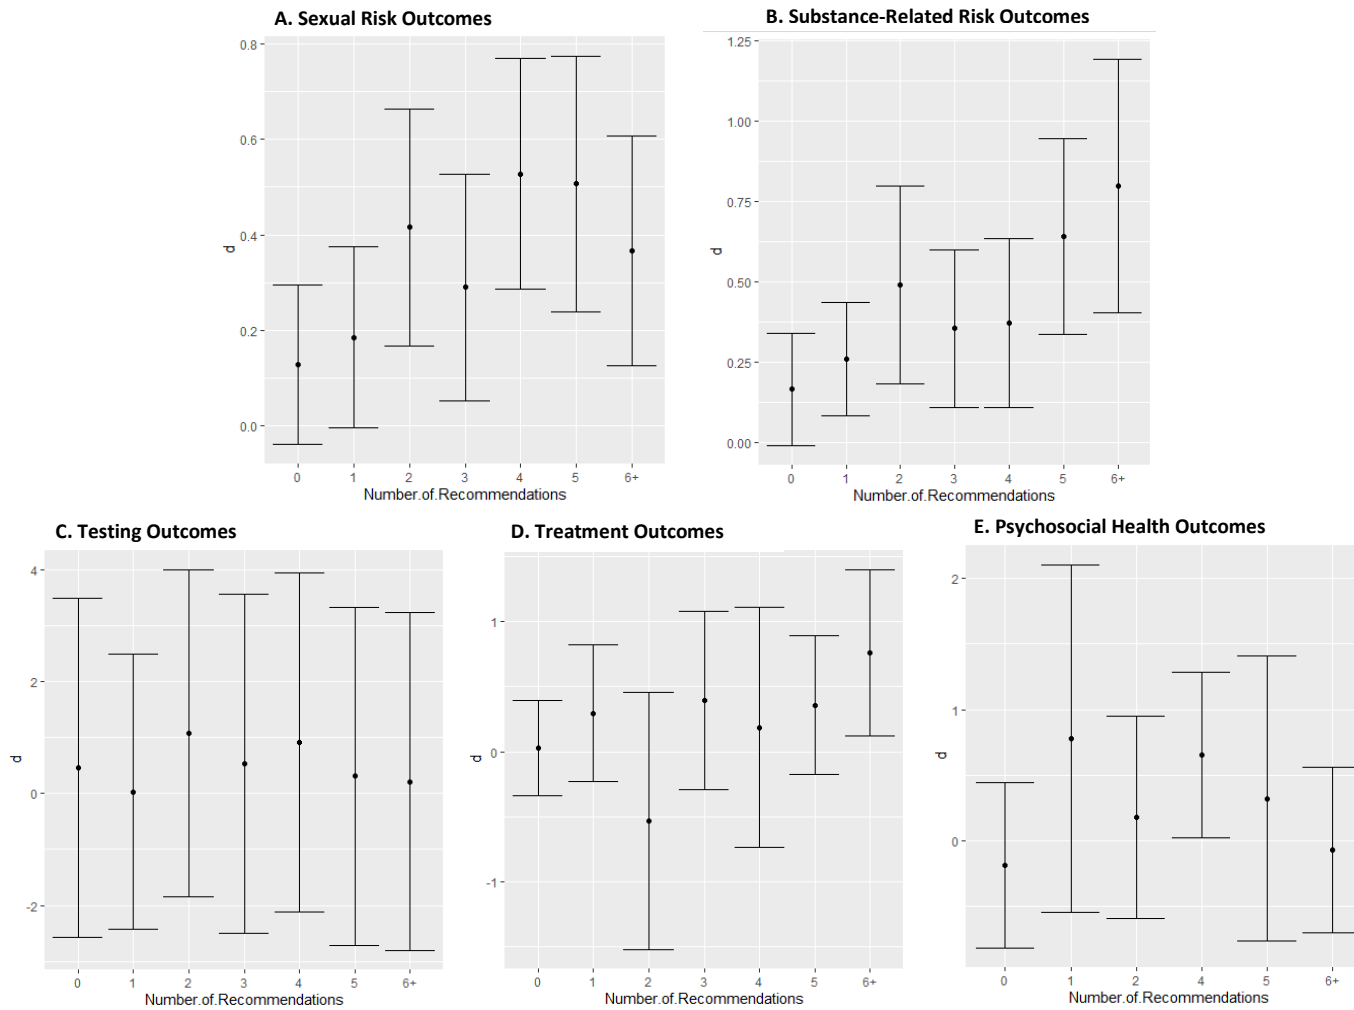

The weighted-mean average of overall change for each recommendation number for outcomes related to (A) sexual risk, (B) substance-related risk, (C) testing, (D) treatment, and (E) psychosocial health. Recommendation number was treated as a continuous variable in the meta-regression model. For plotting purposes, however, interventions recommending 6 to 14 recommendations were grouped together.



## APPENDIX L

## Exploratory moderator analyses

We also conducted moderator analyses to determine whether there were participant or intervention characteristics that influenced intervention efficacy. All moderator analyses were first conducted with the full sample. However, where the moderators of interest (e.g., exposure setting, delivery format) only pertained to intervention groups, control groups recommending no behavior were excluded. Interventions were more efficacious when they recruited participants from a hospital/clinic setting ( $d = 0.49$ ,  $CI = [0.31, 0.67]$ ,  $k = 117$ ), than when they did not ( $d = 0.23$ ,  $CI = [0.13, 0.33]$ ,  $k = 73$ ). This suggests that targeting those who are already seeking health services improves intervention success. These results are consistent with previous reviews (Albarracín et al., 2005) that have found similar moderating effects, and suggest that future interventions may benefit from targeting those who are already motivated to change. In addition, interventions were also more efficacious when they incorporated random assignment ( $d = 0.40$ ,  $CI = [0.20, 0.60]$ ,  $k = 248$ ), than when they did not ( $d = 0.03$ ,  $CI = [-0.16, 0.21]$ ,  $k = 35$ ). This suggests that methodological factors can impact the detection of intervention effects. Although the interpretation of these results are unclear, they could suggest that those interventions that are more methodological rigorous also include other characteristics that contribute to intervention success. The rest of the moderators had no significant effect.

## APPENDIX M

## References included in the appendices

Albarracín, D., Gillette, J. C., Earl, A. N., Glasman, L. R., Durantini, M. R., & Ho, M. H. (2005).

A test of major assumptions about behavior change: A comprehensive look at the effects of passive and active HIV-prevention interventions since the beginning of the epidemic.

*Psychological Bulletin*, 131(6), 856. doi:10.1037/0033-2909.131.6.856

Borenstein, M., Hedges, L. V., Higgins, J. P. T., & Rothstein, H. R. (2009). *Introduction to*

*Meta-Analysis*. Chichester, UK: John Wiley & Sons.

Brookmeyer, K. A., Hogben, M., & Kinsey, J. (2016). The role of behavioral counseling in STD prevention program settings. *Sexually Transmitted Diseases*, 43, 102-112.

doi:10.1097/OLQ.0000000000000327

Caldwell, D. M., Ades, A. E., & Higgins, J. P. T. (2005). Simultaneous comparison of multiple treatments: Combining direct and indirect evidence. *British Medical Journal*, 331(7521),

897-900. doi:10.1136/bmj.331.7521.897

Chinn, S. (2000). A simple method for converting an odds ratio to effect size for use in meta-analysis. *Statistics in Medicine*, 19(22), 3127–3131. doi:10.1002/1097-

0258(20001130)19:22<3127::AID-SIM784>3.0.CO;2-M

Glenny, A. M., Altman, D. G., Song, F., Sakarovitch, C., Deeks, J. J., D'Amico, R., Bradburn,

M., & Eastwood, A. J. (2005). Indirect comparisons of competing interventions. *Health Technology Assessment*. doi:10.3310/hta9260

Karlsson, P., & Bergmark, A. (2015). Compared to what? An analysis of control-group types in Cochrane and Campbell reviews of psychosocial treatment efficacy with substance use

disorders. *Addiction*, 110, 420-428. doi:10.1111/add.12799

Lumley, T. (2002). Network meta-analysis for indirect treatment comparisons. *Statistics in Medicine*, 21(16), 2313-2324. doi:10.1002/sim.1201

Michie, S., Atkins, L., & West, R. (2015). *The behaviour change wheel: A guide to designing interventions*. UK: Silverback Publishing.

Sweeting, M. J., Sutton, A. J., & Lambert, P. C. (2004). What to add to nothing? Use and avoidance of continuity corrections in meta-analysis of sparse data. *Statistics in Medicine*, 23(9), 1351–1375. doi:10.1002/sim.1761

Tanner-Smith, E. E., & Tipton, E. (2014). Robust variance estimation with dependent effect sizes: Practical considerations including a software tutorial in Stata and SPSS. *Research Synthesis Methods*. doi:10.1002/jrsm.1091

Viechtbauer, W. (2010). Conducting meta-analyses in R with the metafor package. *Journal of Statistical Software*, 36(3), 1-48. doi:10.18637/jss.v036.i03

World Health Organization. (2015). Consolidated guidelines on HIV testing services: 5Cs: Consent, confidentiality, counselling, correct results and connection 2015.
